1

2

3

4 Does plant diversity determine the diversity of the rhizosphere microbial community?

5

6

7 Aleksei Zverev<sup>1\*</sup>, Arina Kichko<sup>1</sup>, Vasiliy Shapkin<sup>1</sup>, Aleksandr Pinaev<sup>1</sup>, Nikolay Provorov<sup>1</sup>,

8 Evgeny Andronov<sup>1</sup>

9

10

11

12 <sup>1</sup>Laboratory for microbiological monitoring and soil bioremediation, All-Russian Research

13 Institute for Agricultural Microbiology,, Saint-Petersburg, Russia

14

15

16 \* Corresponding author

17 Email: [azver.bio@gmail.com](mailto:azver.bio@gmail.com) (AZ)

18

## 19 **Abstract**

20 The rhizosphere community represents an “ecological interface” between plant and soil,

21 providing the plant with a number of advantages. Close connection and mutual influence in this

22 communication allow to talk about the self-adjusting “plant-rhizosphere community” system, which  
23 should be be studied in connection. Diversity estimation is one of the ways of describing both  
24 bacterial and plant communities. Based on the literature, there are two assumptions of how the  
25 diversity of plant communities related to the diversity of bacterial communities: 1) an increase in  
26 the species richness of plants leads to an increase in the number of available micro-niches, and  
27 increasing of microbial diversity, 2) an increase in the species richness of plants is accompanied by  
28 the predominant development of bacteria from highly productive specific taxa and decreasing in the  
29 diversity of microorganisms. Experimental studies show controversial results.

30 We analyzed field sites (rye crop field and two fallow sites), using DNA isolation of both the  
31 plant root mass (followed by sequencing of the ITS1 region) and rhizosphere microorganisms  
32 (followed by sequencing of the 16s rDNA V4 region). This allowed us to 1) accurately determine  
33 the abundance and taxonomic position of plant communities; 2) extract information about both  
34 plant and microbial communities from the same sample.

35 There was no correlation between alpha-diversity indices of plants and rhizosphere  
36 communities. Alpha-diversity connection should be explored in similar plant communities, such as  
37 synusia. We hypothesize, that the significant differences in plant abundances lead to significant  
38 changes in exudation profiles, and the loss of diversity connection. The beta-diversity between  
39 rhizosphere communities and plant communities is highly correlated, in particular in terms of the  
40 abundance of taxa. This can be explained by a potential correlation (as reported in the literature) or  
41 by the presence of statistical artifacts.

42

## 43 **Introduction**

44 As the formation of a specific microbial community near the plant root, the phenomenon of  
45 the rhizosphere effect has been the subject of many works of both classical and modern biology.

46 The rhizosphere community represents an “ecological interface” between plant and soil, providing  
47 the plant with a number of advantages such as growth stimulation, protection from pathogens,  
48 nutrition, among others [1, 2]. The source of the rhizosphere microbiome is both the microbial  
49 community of plant seeds [3] and the community of soil microorganisms [4]. The composition and  
50 abundance of plant root exudates determine the formation of the bacterial community [5, 6]. The  
51 source of the microbiome, and the development of it, thus forms the final community.

52 Diversity in both sources and ways of development lead to the specificity of the rhizosphere  
53 microbiome. Several factors can affect the composition of rhizosphere communities. In addition to  
54 the type and agrochemical properties of the soil, the genotype of the plant (species [7, 8] and  
55 cultivar [9]) is a significant factor for microbiome development. This can be explained by the  
56 specific exudation spectrum from various plants, as the spectrum of secreted substances depends not  
57 only on the species or cultivar but also on the developmental phase, physiological state, etc. [10,  
58 11]. In turn, the microbial communities themselves affect the metabolic status of the plant [12],  
59 which allows us to talk about the “plant-rhizosphere community” system as a self-adjusting system  
60 (a kind of “gut-brain axis” in plants). This system is additionally complicated by the high diversity  
61 of plant species, which is natural in indigenous plants populations.

62 Diversity estimation is one of the ways of describing both bacterial and plant communities. As  
63 self-adjusting systems, rhizosphere microbiomes and plant communities are connected, and  
64 therefore, the following question arises: is the diversity of plant communities related to the diversity  
65 of bacterial communities? Based on the literature, there are two assumptions: 1) an increase in the  
66 species richness of plants leads to an increase in the number of available micro-niches, which leads  
67 to an increase in microbial diversity, 2) an increase in the species richness of plants is accompanied  
68 by the predominant development of bacteria from highly productive specific taxa, which leads to a  
69 general decrease in the diversity of microorganisms [13]. Experimental studies of this relationship  
70 show controversial results: some studies indicate the absence or negative correlation between plant

71 and bacterial richness [14, 15], whereas others show the presence of a positive relationship [16].  
72 Beta diversity indices show an unambiguous positive correlation between the distances of plant and  
73 bacterial communities [17].

74 There are examples of research of similar relationships between the diversity of plants and the  
75 associated microorganisms. A close relationship was demonstrated in a study of the diversity of the  
76 rhizobial soil community (by the *nodA* gene) and the diversity of their symbiotic hosts (the NFR5  
77 and K1 genes of leguminous plants), allowing the authors to formulate the hypothesis of  
78 "evolutionary molding", where the plant community plays the role of the rigid matrix and the  
79 microbial community acts as a "molding" substance. The whole process not only links diversities,  
80 but even phylogenetic topologies; for the description of the last phenomenon, the concept of beta-  
81 topological diversity has been introduced [18]. Another example is the close relationship between  
82 the diversity of *Galega* rhizobia and their two hosts, *G. orientalis* and *G. officinales*, revealed at the  
83 level of genomic AFLP fingerprints [19]. However, for less closely integrated systems with  
84 indigenous plant communities, analyzed by taxonomic rather than functional markers, such a  
85 relationship has not yet been shown.

86 One of the reasons for the uncertainty in this area is, most likely, the problem of the correct  
87 estimation of plant diversity, for which the same algorithms that are used today for the analysis of  
88 microbial diversity could be applied. The development of NGS methods for the estimation of  
89 microbial diversity, from DNA extraction methods to statistical analysis of libraries (16S, ITS), has  
90 led to the rise of this area observed today [20]. However, in most papers, plant diversity is  
91 determined using geobotanical methods [13, 15], but this approach is not accurate enough in both  
92 determining the species in the communities and their abundances [21]. In addition, in the context of  
93 the aim of this study, there is a question about the correspondence between the "aboveground" and  
94 "belowground" plant diversities, which can be quite different [22].

95           Therefore, in this work, we analyzed the diversity of the plant population via direct DNA  
96 isolation of the plant root mass, followed by NGS sequencing of the ITS1 region; rhizosphere soil  
97 samples were taken from the same root sample. This allowed us to 1) accurately determine the  
98 abundance and taxonomic position of plant communities; 2) extract information about both plant  
99 and microbial communities from the same sample; 2) analyze plant diversity using the same NGS  
100 approaches as used for the rhizosphere community of microorganisms. Thus, we were able to use  
101 the same algorithms and metrics to analyze both communities.

102

## 103 **Materials and Methods**

104           Samples were collected on July 21, 2017, on fields of the Pskov Research Institute of  
105 Agricultural Sciences and Rodina State Farm in the Pskov region, Russia (coordinates of the  
106 collection point are 57.845611 N 28.201028 E). We select one site within a rye crop field (referred  
107 to as Monoculture Rye or MonoR) and two fallow sites outside the field border from two locations,  
108 dominated by cereals (Polyculture Cereal or PolyC) and *Galium* and *Dactylis* species (Polyculture  
109 Galium, or PolyG). In each site, three samples were taken. The photo and the geobotanical  
110 description of the sampling sites is provided in the S1 Table and S1 Fig.

111           Bricks of topsoil (about 15 x 15 x 10 cm) were collected and stored in individual packages not  
112 longer than 48 hours. In the laboratory, bulk soil was gently removed manually by shaking, and 30  
113 g of the root mass was intensively shaken with 50 ml of 0.005M Na-phosphate buffer in a Pulsifier  
114 II (Microgen, UK) in provided bags (PUL512 Bags) for 1 min. The liquid fraction was centrifuged,  
115 and the pellet was used to isolate the total rhizosphere DNA. The root mass was used to isolate  
116 plant DNA.

117           Procaryotic DNA from the pellet was isolated using the MN NucleoSpin Soil Kit (Macherey-  
118 Nagel, Germany) and a Precellus 24 homogenizer (Bertin, USA). Quality control was carried out by

119 PCR and agarose gel electrophoresis. Sequencing of the V4 variable region of the 16S rRNA gene  
120 was performed on an Illumina MiSEQ sequencer, using the primers F515  
121 (GTGCCAGCMGCCGCGGTAA) and R806 (GGACTACVSGGGTATCTAAT) [23].

122 Plant DNA from roots was isolated using mechanical destruction in liquid nitrogen, followed  
123 by phenol extraction; the quality of the DNA was also checked via agarose gel electrophoresis.  
124 Sequencing of the ITS1 variable region was performed on an Illumina MiSEQ sequencer, using the  
125 primers ITS-p5 (YGA<sup>CTCTCGGCAACGGATA</sup>) and ITS-u2  
126 (GCGTTCAAAGAYTCGATGRTTC) [24].

127 The general processing of sequences was carried out in R 3.6.4, using the dada2 (v. 1.14.1)  
128 [25] and phyloseq (v. 1.30.0) [26] packages. For taxonomic annotation, the databases SILVA 138  
129 [27] and PLANiTS [28] were used.

130 The main alpha- and beta-metrics were calculated using the phyloseq and picante [29]  
131 packages. For the mean p-distance in a library, we used the home-brew script with following steps:  
132 1) make multiple alignment for reference sequences; 2) extract p-value for every pair of sequence;  
133 3) multiple this p-value to abundance of both sequences; 3) sum all values. Correlations between  
134 diversity indices were calculated using Spearman correlation. Significant differences in abundances  
135 of taxa between sites were determined using theDeSEQ2 package [30].

136 All reads were submitted to SRA (PRJNA649486) and are available under the link  
137 <https://www.ncbi.nlm.nih.gov/sra/PRJNA649486>.

138

## 139 **Results**

140 The ITS1 sequencing of plant DNA yielded 230 ASVs. The taxonomic position at genus level  
141 was defined for 217 of them; the number of reads per sample after rarefaction was 14,210.  
142 Regarding 16s rDNA, we found 5,284 ASVs, with 15,487 reads per sample.

143 Fig 1 shows the taxonomic composition of the communities. The geobotanic description  
144 (provided in the S1 Table) corresponded with the composition structure according to ITS1  
145 sequencing (Fig 1A). Almost all reads from MonoR libraries were attributed as *Secale*; PolyC  
146 (samples from the cereal synusia) had about half the reads from *Poa*, followed by *Elymus* and  
147 *Dactylis*. PolyG (samples from *Galium* and *Dactylis* synusia) was more diverse; most reads were  
148 attributed as *Galium*, *Poa*. Despite the geobotanical description of this synusia as mixed *Galium*  
149 and *Dactylis*, there was no evidence of a great amount of *Dactylis* in the PolyG libraries, which can  
150 be explained by difficulties in describing the gramineae vegetation outside the flowering phase.

### 151 **Fig 1. Relative abundances of plant and bacterial communities in the experimental fields**

152 The bacterial communities from the samples (Fig 1B) were typical for rhizosphere  
153 microbiomes [11]. The communities from the two fallow sites (PolyC, PolyG) were similar,  
154 whereas the communities from the rye site (MonoR) contained more *Gammaproteobacteria*  
155 (*Proteobacteria*) and *Bacteroidia* (*Bacteroideta*). Differential abundance analysis allowed us to find  
156 584 microbial taxa, which significantly differed between two sites, with information about  
157 abundance in repeats. When comparing PolyC and PolyG, none of the OTUs was marked as  
158 significantly different. The results of the pairwise comparison of PolyC and PolyG with MonoR are  
159 shown in Fig 2 at the order level.

### 160 **Fig 2. Mean abundances of bacterial orders with different inter-source abundances** 161 **(according to DeSEQ2)**

162 In this comparison, the most abundant OTUs in rye crop rhizosphere microbiomes were from  
163 *Proteobacteria* (orders *Pseudomonadales*, *Sphingomonadales*, *Enterobacteriales*), followed by  
164 *Armatimonadota* (*Fimbriimonadales*), *Acidobacteriales* (*Bryobacterales*), and *Actinobacteriota*  
165 (*Micrococcales*). In fallow root microbiomes, *Verrucomicrobia* (*Chthoniobacteriales*),  
166 *Acidobacteria* (*Blastocatellales*), and *Actinobacteria* (*Pseudonocardiales*) were more abundant.

167 For all samples, the most common alpha-diversity indices, observed OTUs, Shannon,  
168 Simpson, mpd (mean pairwise distance), and p-dist (mean p-distance, restored from alignment, see  
169 Materials and Methods), were calculated at different taxonomic levels (Fig 3).

170 **Fig 3. Alpha-diversity indices for plant and bacterial communities (significance for**  
171 **ANOVA in groups; ns – non-significant, \* -  $p < 0.05$ , \*\*  $p < 0.01$ , \*\*\*  $p < 0.005$ )**

172 The plant communities were highly diverse at different levels and indices (Fig 3A). The  
173 observed OTU index was not useful because of the presence of weedy plants in the rye crop.  
174 Weighted indices, such as mpd or p-dist, were more suitable; the differences between sample sites  
175 were significant for both indices up to the order level.

176 The bacterial communities were less diverse. The observed OTUs as well as the p-dist and  
177 mpd indices showed that communities from the PolyC site were more diverse, mostly at low  
178 taxonomical levels (OTUs, genus). Interestingly, samples from rye roots (MonoR) were  
179 significantly less diverse at phylum level, whereas at other taxonomical ranks, there were no such  
180 differences.

181 For each index on the OTU taxonomic level, the correlation between plant diversity indices  
182 and microbial diversity indices was calculated. We observed no significant correlations between  
183 plant and rhizosphere microbial diversity.

184 Fig 4 shows the beta-diversity indices (Bray distance and weighted UniFrac). According to the  
185 weighted UniFrac index (Dunn index for roots 0.316, for microorganisms 0.821), the samples were  
186 mixed (Fig 4A). Samples from rhizosphere communities from PolyC and PolyG were mixed in one  
187 cluster. While the MonoR and PolyC samples were close, the PolyG samples were different. This  
188 might be connected to the phylogenetic composition of the population; *Secale* and *Poa*, the two  
189 main genera from these sites, both belong to the *Poaceae* family, whereas *Galium* belongs to the  
190 Rubiaceae family (Fig 1A).



191 **Fig 4. Beta-diversity indices for plant and bacterial communities**

192 According to the Bray distance (Dunn index for roots 0.832, for microorganisms 0.909), all  
193 communities, from plants and from rhizospheres, formed their own clusters (Fig 3B).

194 The correlation between the distance matrix in plant and bacterial communities was high for  
195 the Bray distance ( $R = 0.866$ ,  $p = 0.01$ ) and not significant for the weighted UniFrac index. Fig 5  
196 shows the results of the beta-distance correlation, excluding the intra-cluster distance (distance  
197 between repeats of the same sample).

198 **Fig 5. Correlation between beta-diversity indices**

199 **Discussion**

200 The aim of this work was to determine the potential connection between the diversity of plant  
201 communities and the diversity of rhizosphere microbiomes. For this purpose, we used three sites  
202 with different plant communities (synusiae) in the same location: a rye crop monoculture (MonoR)  
203 and two polyculture fallow sites, dominated by cereals (PolyC) and *Galium* and *Dactylis* (PolyG).  
204 Despite differences in crop species and tillage, soil type, water regime, and main soil properties  
205 were similar for all three sites, minimizing the influence of these factors on microbial communities.

206 The novel approach to estimate plant community composition (ITS1 sequencing) is highly  
207 effective. Almost all (217 of 230) determined ASVs were annotated, and the composition and  
208 abundance of plant genera fit the geobotanical description. In addition, this method allows 1) to  
209 characterize plant communities via their underground parts (which interact with rhizosphere  
210 microorganisms); 2) use the same sample for both plant and microbiome analysis (therefore, each  
211 rhizosphere library matches with the plant library); 3) use standard approaches for processing and  
212 calculating diversity indices and generating bar graphs.

213 For samples obtained from same soil and location, the most important factor shaping the  
214 microbial community of the rhizosphere is the plant community structure. We hypothesize that the

215 variation in the spectrum of exudates could be one of the possible mechanisms responsible for the  
216 diversity of the rhizosphere microbial community. This spectrum is specific for various plant  
217 species and genotypes, and therefore, in the case of the whole plant community, we can talk about  
218 an “exudome” of the community, whose structure depends on the abundance of plants in the  
219 community. This exudome can be described by the number of the individual plant spectra and by  
220 their weights (amount of exudate spectra of exact plant species in all exxudome), according plant  
221 abundances. In the comparison of two polycultures, the number of plant species is the same (as  
222 shown in Fig 3A), with variations in abundance; it therefore seems logical that the exudomes of  
223 these communities also will differ not in the number of different spectra but in their weights. In  
224 contrast, when comparing monoculture plants communities with polyculture ones, there are  
225 differences in the number of plant species. In this case, exudomes of plant communities will differ  
226 in the number of different spectra and in their weights.

227 In this study, using modern approaches, we found no correlation between different alpha-  
228 diversity indices. According to all indices, rhizosphere communities in the monoculture site  
229 (MonoR) were as diverse as those in the polycultures (PolyR, PolyC), whereas the plant community  
230 diversity in the monoculture was obviously lower. Regarding the polyculture (and mpd and p-dist  
231 indices), more diverse plant communities (PolyG) showed a less diverse rhizosphere microbial  
232 community. This might be evidence of a negative connection, as suggested by Goberna and  
233 coauthors [13], but this connection can be found only in plant communities with close exudomes  
234 (differing in abundance by not in the number of spectra). Significant differences in exudomes can  
235 lead to different microbial response and a loss of similarity, when environmental factors override  
236 the realistic relationship. Perhaps, this variation in exudome abundance allowed Schlatter and  
237 colleagues to show that in artificial plant communities, there is a decrease in bacterial diversity with  
238 increasing richness (1, 4, 8, 16 species) [31].

239           Despite the expected main difference in plant diversity between poly- and monocultures, with  
240 a moderate variation between polycultures, both alpha- and beta-diversity of the plants showed  
241 significant variations between synusiae. In the community of different cereals, PolyG in most cases  
242 is significantly more diverse by all alpha-diversity indices, and shows inter-sample variability  
243 (sample PolyG.3). This effect is also clear at higher taxonomic levels (family or order).

244           Differential abundance analysis did not show any difference between rhizosphere  
245 communities of polycultures. Similarly, OTUs and Shannon indices of these samples were also not  
246 significantly different. Only phylogenetic-related indices (mpd and p-dist) were significantly  
247 different, leading us to infer that the phylogenetic composition of communities varies in the  
248 rhizospheres of similar plant communities. However, further elaboration of this theory is  
249 recommended.

250           In contrary, when comparing the microbial communities of the polyculture sites with those of  
251 the monoculture, there was a significant difference in the observed OTUs, whereas phylogenetic-  
252 related indices (mpd, p-dist) showed no clear pattern. Differential abundance analysis enabled us to  
253 identify taxa with significant differences in relative diversity, most likely because of significant  
254 differences in exudome profiles and the loss of similarity between plant-microbial systems.

255           This idea also fits well with the beta diversity plots. Indeed, the distances between samples  
256 from polycultures were small for both plant and bacterial communities (about 17% of the explained  
257 variance in PcoA plots for plants and 8% for microorganisms). The distances between samples from  
258 mono- and polycultures were large (about 60% of the explained variance in PcoA plots). This  
259 allowed us to estimate a correlation for Bray distances only (due to the taxonomic similarity  
260 between rye and cereal, the correlations between weighted Unifac distances were not significant).  
261 This correlation might be a true correlation, as observed in previous studies [17], or a statistical  
262 artifact (caused by the large distance between monoculture and polyculture clusters).

263           The significant distance in beta-diversity is connected to the differences in the abundances of  
264 the different taxa. Hypothesized as a molding matrix, differences in abundances between plant  
265 communities are not useful, whereas abundances of microbial taxa represent the specificity of  
266 rhizosphere taxa in different plant communities (at the order level, as shown in Fig 2). Some of  
267 them have previously been reported as rhizosphere taxa. *Sphingomonadales* and *Enterobacteriales*  
268 are typical for plant rhizosphere communities [32], and *Fimbriimonadales* has previously been  
269 described as a bacterial taxon from the *Anthurium andraeanum* rhizosphere community [33]. In the  
270 same case, *Blastocatellales* has previously been described as an oligotrophic, slightly acidophilic to  
271 neutrophilic mesophile from arid soils [34]. However, these data are controversial, as they can  
272 describe a novel location of this microorganism or a biased database. More precise data can be  
273 obtained by functional or full-genomic analyses of rhizosphere communities.

274           Despite the absence of a clear correlation between plant and bacterial diversity, comparing the  
275 results with the previously mentioned concept of evolutionary molding, where the plant population  
276 "molds" in the microbial population and where the correlation between plant and microbial  
277 diversities is clear, is challenging. The reasons are as follows: 1) the symbiotic system itself is  
278 tighter than the rhizosphere community interaction; 2) in this work, we used regular taxonomic  
279 marker genes, not specific plant or bacterial genes. A closer interaction could be revealed with the  
280 use of genes directly involved in plant-rhizosphere communication processes. This could be plant  
281 genes involved in plant root exudation and responses to bacterial signals (for example,  
282 strigolactone-processing genes) and bacterial genes involved in the decomposition of those exudates  
283 by microorganisms. Also, it is important to characterize the structure and composition of common  
284 exudation profiles of different plant communities.

285

## 286 **Conclusions**

287       1. Sequencing of the ITS1 region is highly effective for the taxonomical annotation of plant  
288 communities. Almost all ASVs were attributed; abundances of taxa fairly corresponded to the  
289 geobotanical descriptions.

290       2. There was no correlation between alpha-diversity indices of plants and rhizosphere  
291 communities. Alpha-diversity connection should be explored in similar plant communities, such as  
292 synusia. Significant differences in plant abundances lead to significant changes in exudation  
293 profiles, different microbial responses, and the loss of diversity connection.

294       3. In contrast, the beta-diversity between rhizosphere communities and plant communities is  
295 highly correlated, in particular in terms of the abundance of taxa. This can be explained by a  
296 potential correlation (as reported in the literature) or by the presence of statistical artifacts.

297       4. In future studies, the diversity connection should be analyzed by searching for functionally  
298 related genetic regions of plants and soil microorganisms.

299

## 300 **Acknowledgments**

301       This work was performed using the equipment of the Genome Technologies and Cell Biology  
302 Common Use Center, All-Russian Research Institute of Agricultural Microbiology.

303

## 304 **References**

- 305 1. Gaiero JR, McCall CA, Thompson KA, Day NJ, Best AS, Dunfield KE. 2013. Inside the  
306 root microbiome: bacterial root endophytes and plant growth promotion. *American Journal of*  
307 *Botany* 100: 1738–1750.
- 308 2. Philippot L, Raaijmakers JM, Lemanceau P, van der Putten WH. Going back to the roots:  
309 the microbial ecology of the rhizosphere. *Nat Rev Microbiol*. 2013 Nov;11(11):789-99. doi:  
310 10.1038/nrmicro3109. Epub 2013 Sep 23. PMID: 24056930.
- 311 3. Kong HG, Song GC, Ryu CM. Inheritance of seed and rhizosphere microbial communities  
312 through plant-soil feedback and soil memory. *Environ Microbiol Rep*. 2019 Aug;11(4):479-486.  
313 doi: 10.1111/1758-2229.12760. Epub 2019 May 21. PMID: 31054200.
- 314 4. Bakker PAHM, Pieterse CMJ, de Jonge R, Berendsen RL. The Soil-Borne Legacy. *Cell*.  
315 2018 Mar 8;172(6):1178-1180. doi: 10.1016/j.cell.2018.02.024. PMID: 29522740.
- 316 5. Berg G, Smalla K. Plant species and soil type cooperatively shape the structure and  
317 function of microbial communities in the rhizosphere. *FEMS Microbiol Ecol*. 2009 Apr;68(1):1-13.  
318 doi: 10.1111/j.1574-6941.2009.00654.x. Epub 2009 Feb 25. PMID: 19243436.
- 319 6. Schlaeppi K, Bulgarelli D. The plant microbiome at work. *Mol Plant Microbe Interact*.  
320 2015 Mar;28(3):212-7. doi: 10.1094/MPMI-10-14-0334-FI. PMID: 25514681.
- 321 7. Bulgarelli D, Garrido-Oter R, Münch PC, Weiman A, Dröge J, Pan Y, McHardy AC,  
322 Schulze-Lefert P. Structure and function of the bacterial root microbiota in wild and domesticated  
323 barley. *Cell Host Microbe*. 2015 Mar 11;17(3):392-403. doi: 10.1016/j.chom.2015.01.011. Epub  
324 2015 Feb 26. PMID: 25732064; PMCID: PMC4362959.
- 325 8. Edwards J, Johnson C, Santos-Medellín C, Lurie E, Podishetty NK, Bhatnagar S, Eisen JA,  
326 Sundaresan V. Structure, variation, and assembly of the root-associated microbiomes of rice. *Proc*

- 327 Natl Acad Sci U S A. 2015 Feb 24;112(8):E911-20. doi: 10.1073/pnas.1414592112. Epub 2015 Jan  
328 20. PMID: 25605935; PMCID: PMC4345613.
- 329 9. Lundberg DS, Lebeis SL, Paredes SH, Yourstone S, Gehring J, Malfatti S, Tremblay J,  
330 Engelbrekton A, Kunin V, Del Rio TG, Edgar RC, Eickhorst T, Ley RE, Hugenholtz P, Tringe SG,  
331 Dangl JL. Defining the core *Arabidopsis thaliana* root microbiome. *Nature*. 2012 Aug  
332 2;488(7409):86-90. doi: 10.1038/nature11237. PMID: 22859206; PMCID: PMC4074413.
- 333 10. Sasse J, Martinoia E, Northen T. Feed Your Friends: Do Plant Exudates Shape the Root  
334 Microbiome? *Trends Plant Sci*. 2018 Jan;23(1):25-41. doi: 10.1016/j.tplants.2017.09.003. Epub  
335 2017 Oct 17. PMID: 29050989.
- 336 11. Zverev A, Pershina E, Shapkin V, Kichko A, Mitrofanova O, Kobylanskii V, Yuzikhin  
337 O, Belimov A, Andronov E. Molecular Analysis of the Rhizosphere Microbial Communities from  
338 Gramineous Plants Grown on Contrasting Soils. *Microbiology*. 2020. 89. 231-241.  
339 10.1134/S002626172001018X.
- 340 12. Vives-Peris V, de Ollas C, Gómez-Cadenas A, Pérez-Clemente RM. Root exudates: from  
341 plant to rhizosphere and beyond. *Plant Cell Rep*. 2020 Jan;39(1):3-17. doi: 10.1007/s00299-019-  
342 02447-5. Epub 2019 Jul 25. PMID: 31346716.
- 343 13. Goberna M, Navarro-Cano JA, Verdú M. Opposing phylogenetic diversity gradients of  
344 plant and soil bacterial communities. *Proc Biol Sci*. 2016 Feb 24;283(1825):20153003. doi:  
345 10.1098/rspb.2015.3003. PMID: 26888037; PMCID: PMC4810838.
- 346 14. Dassen S, Cortois R, Martens H, de Hollander M, Kowalchuk GA, van der Putten WH, De  
347 Deyn GB. Differential responses of soil bacteria, fungi, archaea and protists to plant species  
348 richness and plant functional group identity. *Mol Ecol*. 2017 Aug;26(15):4085-4098. doi:  
349 10.1111/mec.14175. Epub 2017 Jun 2. PMID: 28489329.

- 350 15. Li H, Wang X, Liang C, Hao Z, Zhou L, Ma S, Li X, Yang S, Yao F, Jiang Y.  
351 Aboveground-belowground biodiversity linkages differ in early and late successional temperate  
352 forests. *Sci Rep*. 2015 Jul 17;5:12234. doi: 10.1038/srep12234. PMID: 26184121; PMCID:  
353 PMC4505317.
- 354 16. Sun YQ, Wang J, Shen C, He JZ, Ge Y. Plant evenness modulates the effect of plant  
355 richness on soil bacterial diversity. *Sci Total Environ*. 2019 Apr 20;662:8-14. doi:  
356 10.1016/j.scitotenv.2019.01.211. Epub 2019 Jan 18. PMID: 30682712.
- 357 17. Prober SM, Leff JW, Bates ST, Borer ET, Firn J, Harpole WS, Lind EM, Seabloom EW,  
358 Adler PB, Bakker JD, Cleland EE, DeCrappeo NM, DeLorenze E, Hagenah N, Hautier Y,  
359 Hofmockel KS, Kirkman KP, Knops JM, La Pierre KJ, MacDougall AS, McCulley RL, Mitchell  
360 CE, Risch AC, Schuetz M, Stevens CJ, Williams RJ, Fierer N. Plant diversity predicts beta but not  
361 alpha diversity of soil microbes across grasslands worldwide. *Ecol Lett*. 2015 Jan;18(1):85-95.
- 362 18. Igolkina AA, Porozov YB, Chizhevskaya EP, Andronov EE. Structural Insight Into the  
363 Role of Mutual Polymorphism and Conservatism in the Contact Zone of the NFR5-K1 Heterodimer  
364 With the Nod Factor. *Front Plant Sci*. 2018 Apr 11;9:344. doi: 10.3389/fpls.2018.00344. PMID:  
365 29706972; PMCID: PMC5909492.
- 366 19. Osterman J, Chizhevskaja EP, Andronov EE, Fewer DP, Terefework Z, Roumiantseva  
367 ML, Onichtchouk OP, Dresler-Nurmi A, Simarov BV, Dzyubenko NI, Lindström K. *Galega*  
368 *orientalis* is more diverse than *Galega officinalis* in Caucasus--whole-genome AFLP analysis and  
369 phylogenetics of symbiosis-related genes. *Mol Ecol*. 2011 Nov;20(22):4808-21. doi:  
370 10.1111/j.1365-294X.2011.05291.x. Epub 2011 Oct 10. PMID: 21980996.
- 371 20. Sharma TR, Devanna BN, Kiran K, Singh PK, Arora K, Jain P, Tiwari IM, Dubey H,  
372 Saklani B, Kumari M, Singh J, Jaswal R, Kapoor R, Pawar DV, Sinha S, Bisht DS, Solanke AU,  
373 Mondal TK. Status and Prospects of Next Generation Sequencing Technologies in Crop Plants.



374 Curr Issues Mol Biol. 2018;27:1-36. doi: 10.21775/cimb.027.001. Epub 2017 Sep 8. PMID:  
375 28885172.

376 21. Parker J, Helmstetter AJ, Devey D, Wilkinson T, Papadopulos AST. Field-based species  
377 identification of closely-related plants using real-time nanopore sequencing. Sci Rep. 2017 Aug  
378 21;7(1):8345. doi: 10.1038/s41598-017-08461-5. PMID: 28827531; PMCID: PMC5566789.

379 22. Skuodiene R., Tomchuk D. Root mass and root to shoot ratio of different perennial forage  
380 plants under western Lithuania climatic conditions. 2015 Romanian Agricultural Research. 1-11.

381 23. Caporaso JG, Lauber CL, Walters WA, Berg-Lyons D, Lozupone CA, Turnbaugh PJ,  
382 Fierer N, Knight R. 2011. Global patterns of 16S rRNA diversity at a depth of millions of  
383 sequences per sample. Proc Natl Acad Sci U S A 108(Suppl):4516–4522.  
384 doi:10.1073/pnas.1000080107.

385 24. Cheng T, Xu C, Lei L, Li C, Zhang Y, Zhou S. Barcoding the kingdom Plantae: new PCR  
386 primers for ITS regions of plants with improved universality and specificity. Mol Ecol Resour.  
387 2016 Jan;16(1):138-49. doi: 10.1111/1755-0998.12438. Epub 2015 Jul 3. PMID: 26084789.

388 25. Callahan BJ, McMurdie PJ, Rosen MJ, Han AW, Johnson AJ, Holmes SP. DADA2: High-  
389 resolution sample inference from Illumina amplicon data. Nat Methods. 2016 Jul;13(7):581-3. doi:  
390 10.1038/nmeth.3869. Epub 2016 May 23. PMID: 27214047; PMCID: PMC4927377.

391 26. McMurdie PJ, Holmes S. phyloseq: an R package for reproducible interactive analysis and  
392 graphics of microbiome census data. PLoS One. 2013 Apr 22;8(4):e61217. doi:  
393 10.1371/journal.pone.0061217. PMID: 23630581; PMCID: PMC3632530.

394 27. Quast C, Pruesse E, Yilmaz P, Gerken J, Schweer T, Yarza P, Peplies J, Glöckner FO. The  
395 SILVA ribosomal RNA gene database project: improved data processing and web-based tools.  
396 Nucleic Acids Res. 2013 Jan;41(Database issue):D590-6. doi: 10.1093/nar/gks1219. Epub 2012  
397 Nov 28. PMID: 23193283; PMCID: PMC3531112.

- 398 28. Banchi E, Ametrano CG, Greco S, Stanković D, Muggia L, Pallavicini A. PLANiTS: a  
399 curated sequence reference dataset for plant ITS DNA metabarcoding. Database (Oxford). 2020 Jan  
400 1;2020:baz155. doi: 10.1093/database/baz155. PMID: 32016319; PMCID: PMC6997939.
- 401 29. Kembel SW, Cowan PD, Helmus MR, Cornwell WK, Morlon H, Ackerly DD, Blomberg  
402 SP, Webb CO. Picante: R tools for integrating phylogenies and ecology. Bioinformatics. 2010 Jun  
403 1;26(11):1463-4. doi: 10.1093/bioinformatics/btq166. Epub 2010 Apr 15. PMID: 20395285.
- 404 30. Love MI, Huber W, Anders S. Moderated estimation of fold change and dispersion for  
405 RNA-seq data with DESeq2. Genome Biol. 2014;15(12):550. doi: 10.1186/s13059-014-0550-8.  
406 PMID: 25516281; PMCID: PMC4302049.
- 407 31. Schlatter DC, Bakker MG, Bradeen JM, Kinkel LL. Plant community richness and  
408 microbial interactions structure bacterial communities in soil. Ecology. 2015 Jan;96(1):134-42. doi:  
409 10.1890/13-1648.1. PMID: 26236898.
- 410 32. Hartman K, van der Heijden MG, Roussely-Provent V, Walser JC, Schlaeppi K.  
411 Deciphering composition and function of the root microbiome of a legume plant. *Microbiome*.  
412 2017;5(1):2. Published 2017 Jan 17. doi:10.1186/s40168-016-0220-z
- 413 33. Sarria-Guzmán Y, Chávez-Romero Y, Gómez-Acata S, Montes-Molina JA, Morales-  
414 Salazar E, Dendooven L, Navarro-Noya YE. Bacterial Communities Associated with Different  
415 *Anthurium andraeanum* L. Plant Tissues. *Microbes Environ*. 2016 Sep 29;31(3):321-8. doi:  
416 10.1264/jsme2.ME16099. Epub 2016 Aug 11. PMID: 27524305; PMCID: PMC5017810.
- 417 34. Pascual J, Wüst PK, Geppert A, Foessel BU, Huber KJ, Overmann J. Novel isolates double  
418 the number of chemotrophic species and allow the first description of higher taxa in Acidobacteria  
419 subdivision 4. *Syst Appl Microbiol*. 2015 Dec;38(8):534-44. doi: 10.1016/j.syapm.2015.08.001.  
420 Epub 2015 Sep 28. PMID: 26460220.

## 421 **Supporting information**

422

423 **S1 Fig. General view, current location and root samples.** MonoR — rye crop field; PolyC -  
424 forb and cereal meadow dominated by cereals ; PolyG - forb and cereal meadow dominated by  
425 *Galium* and *Dactylis* species. Samples are: 1 — MonoR.1; 2 — MonoR.2; 3 — MonoR.3; 4 —  
426 PolyG.1; 5 — PolyG.2; 6 — PolyG.3; 7 — PolyC.1; 8 — PolyC.2; 9 — PolyC.3;

427 **S1 Table. Geobotanical description of the sampling sites.**

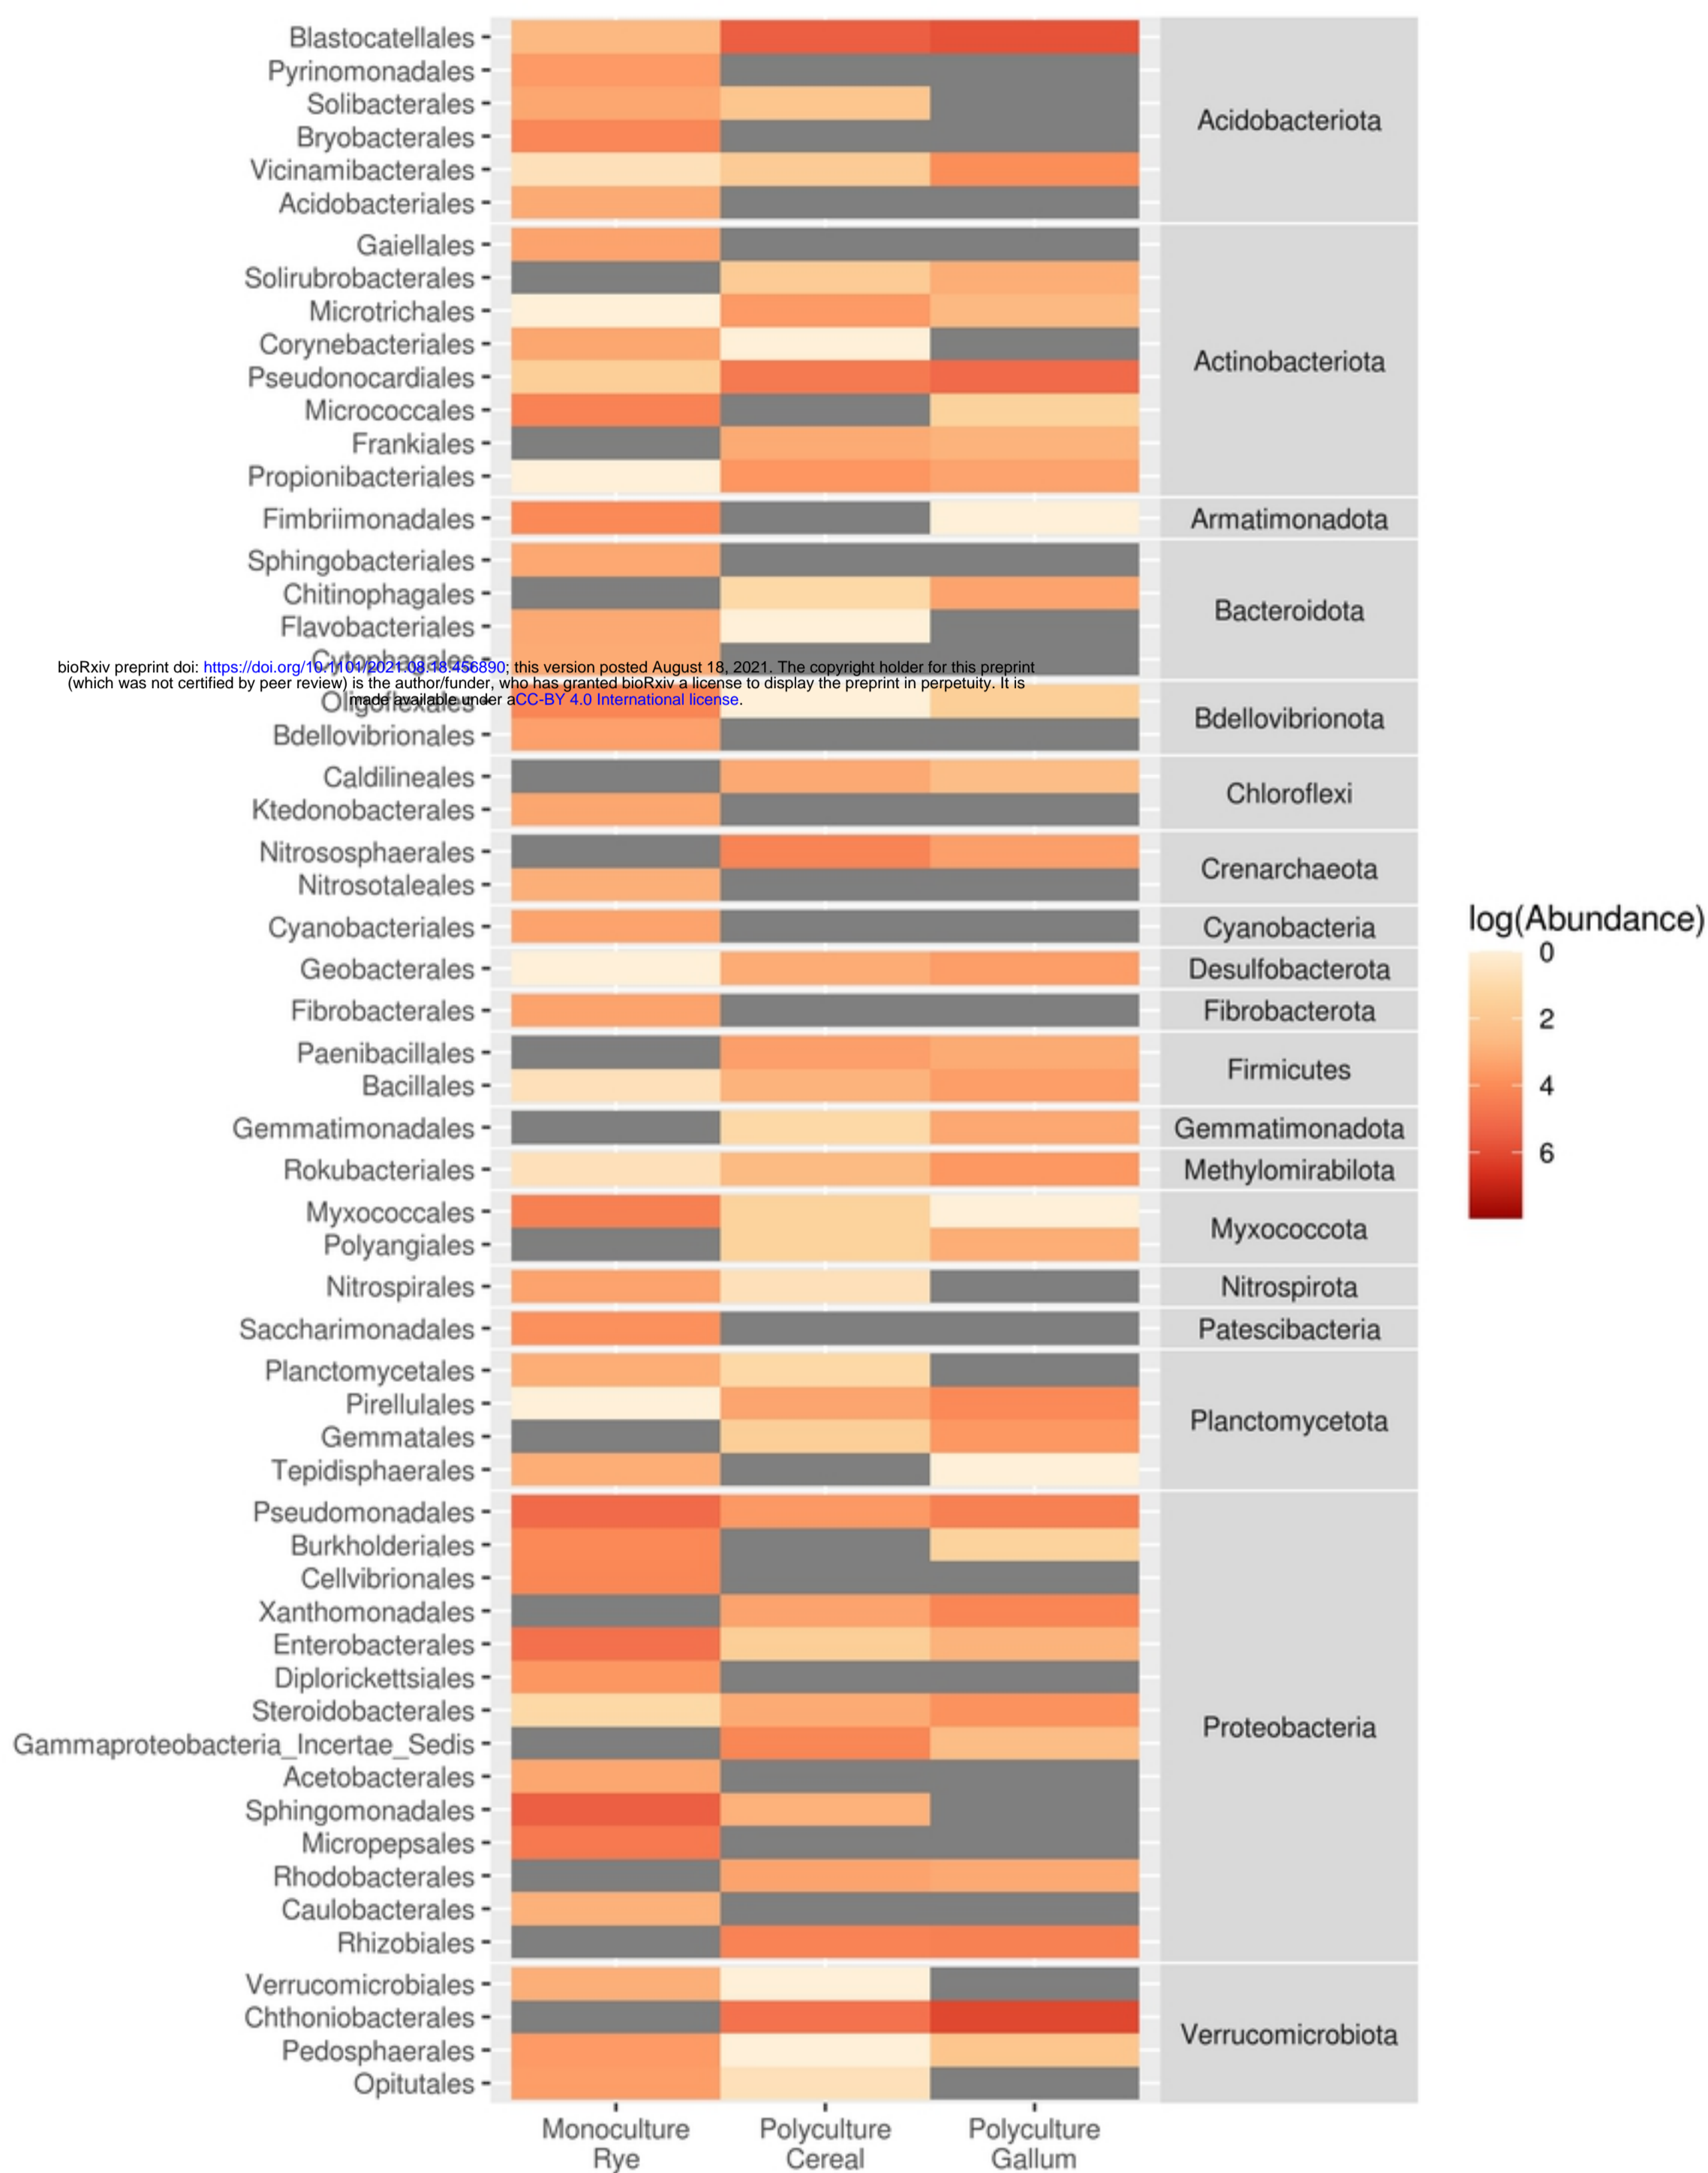

Fig 2

### A. Plant diversity

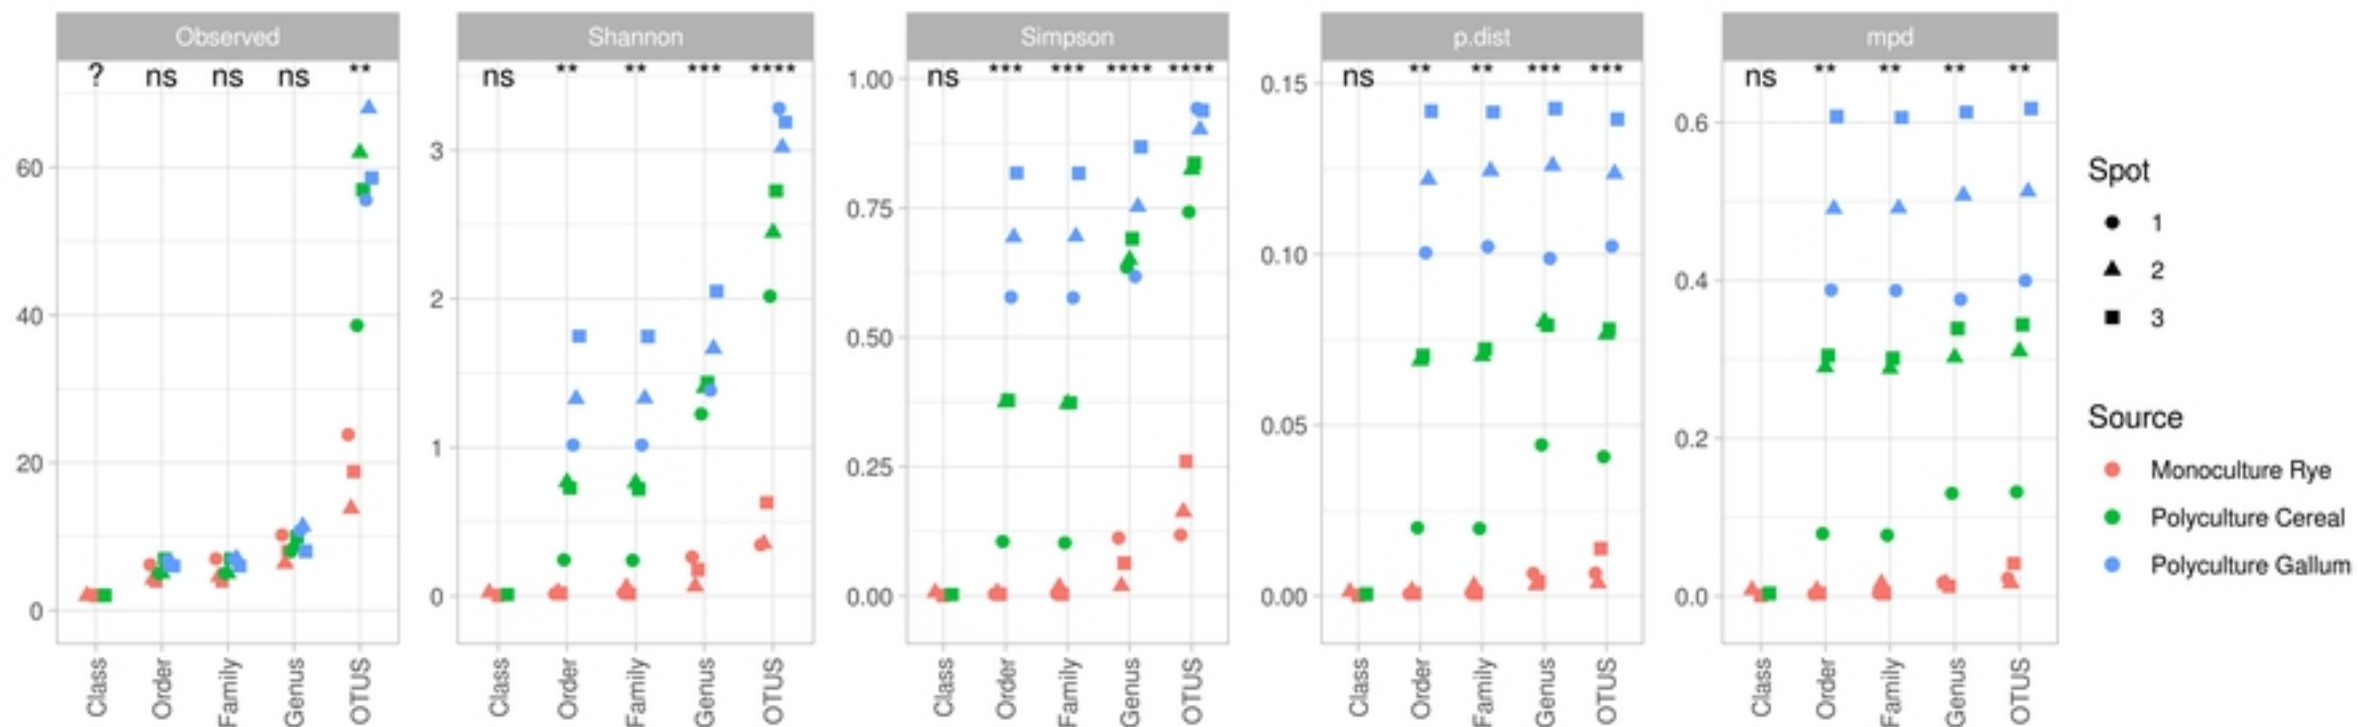

### B. Bacterial diversity

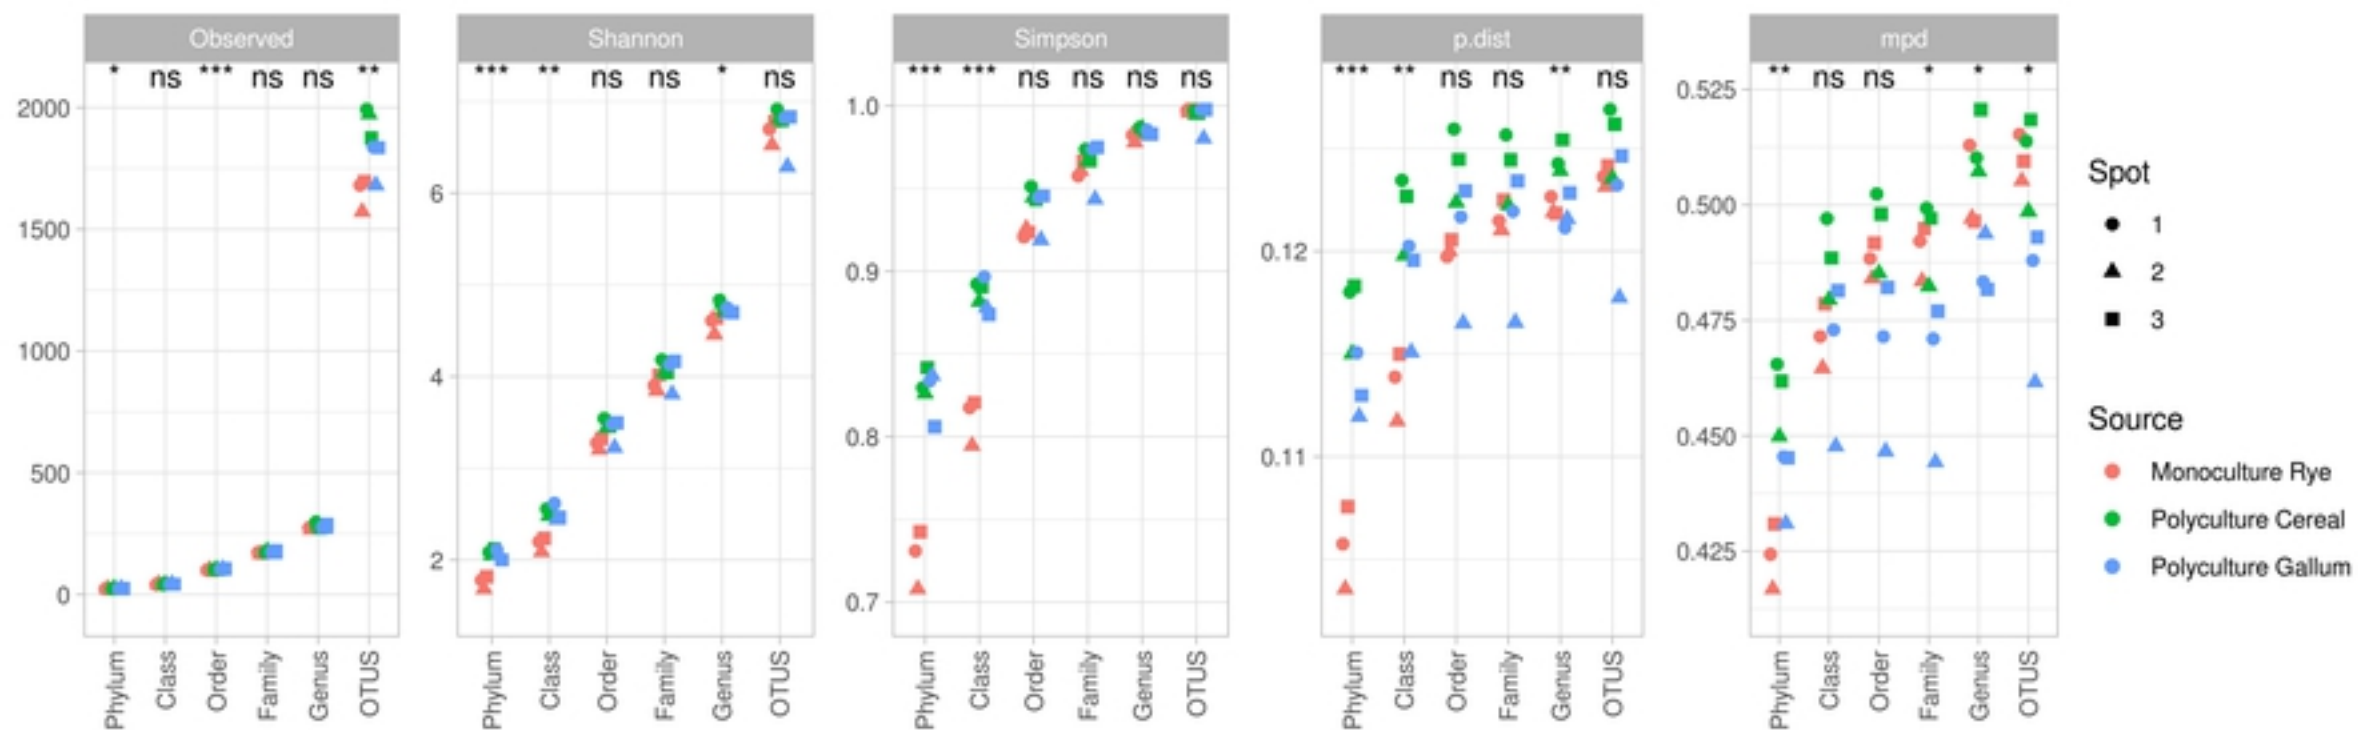

Fig 3

### A. Weighted UniFrac

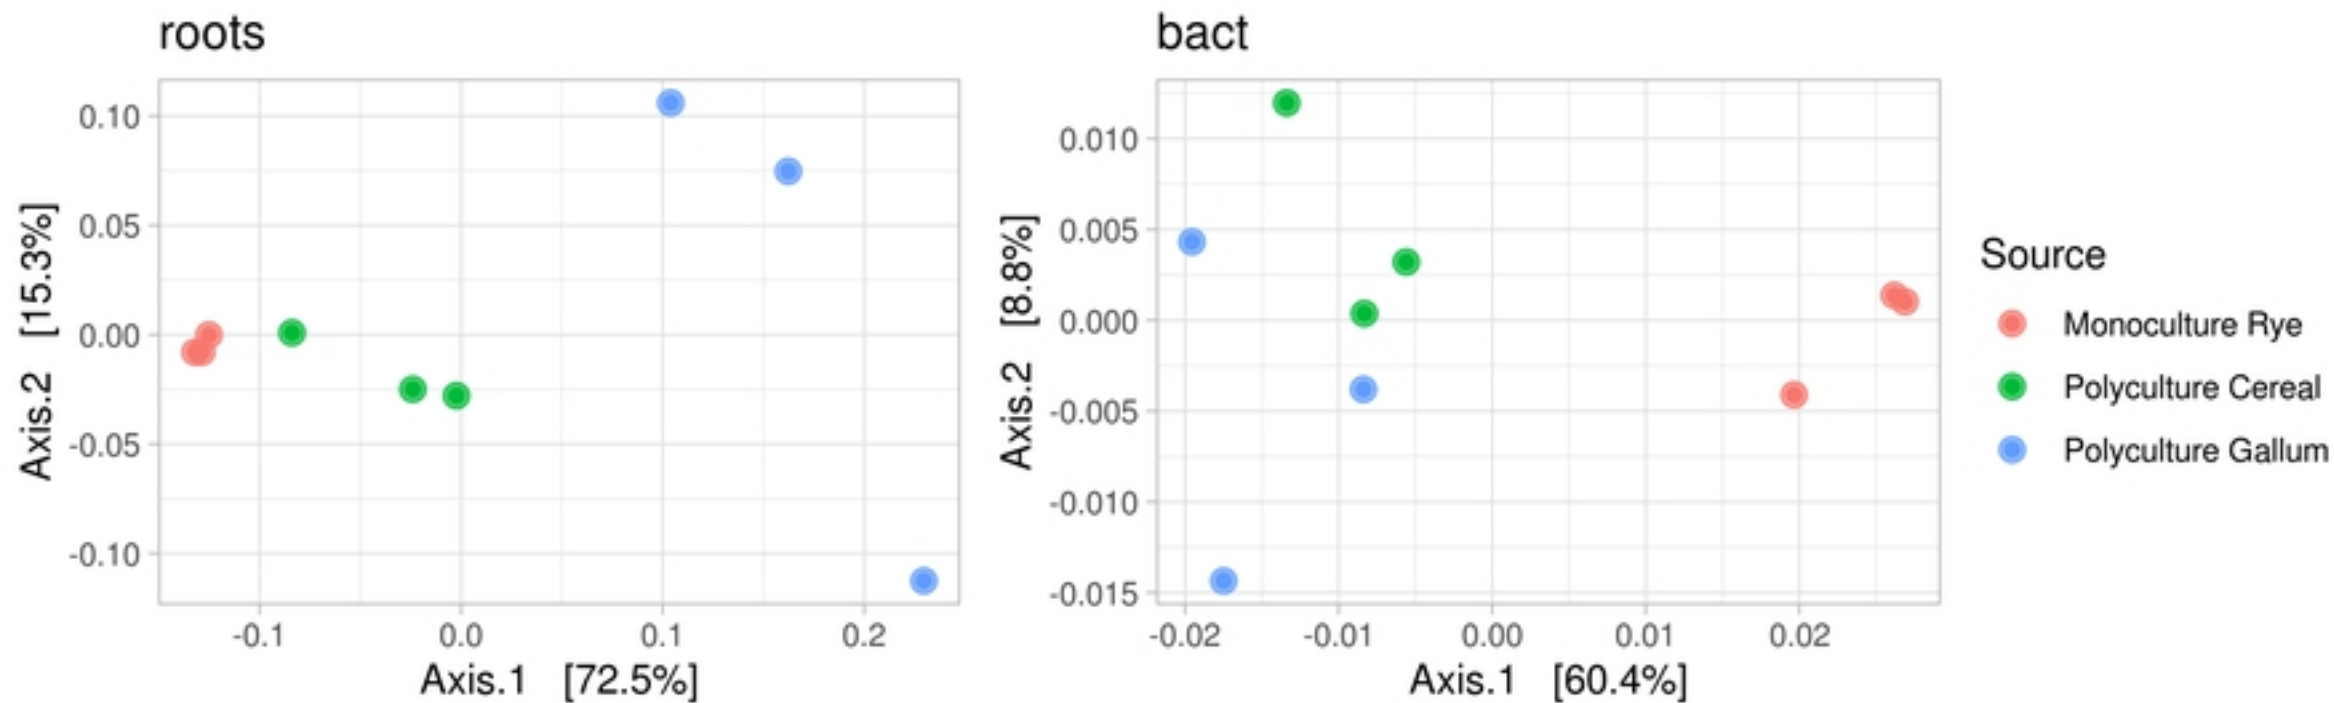

### B. Bray distance

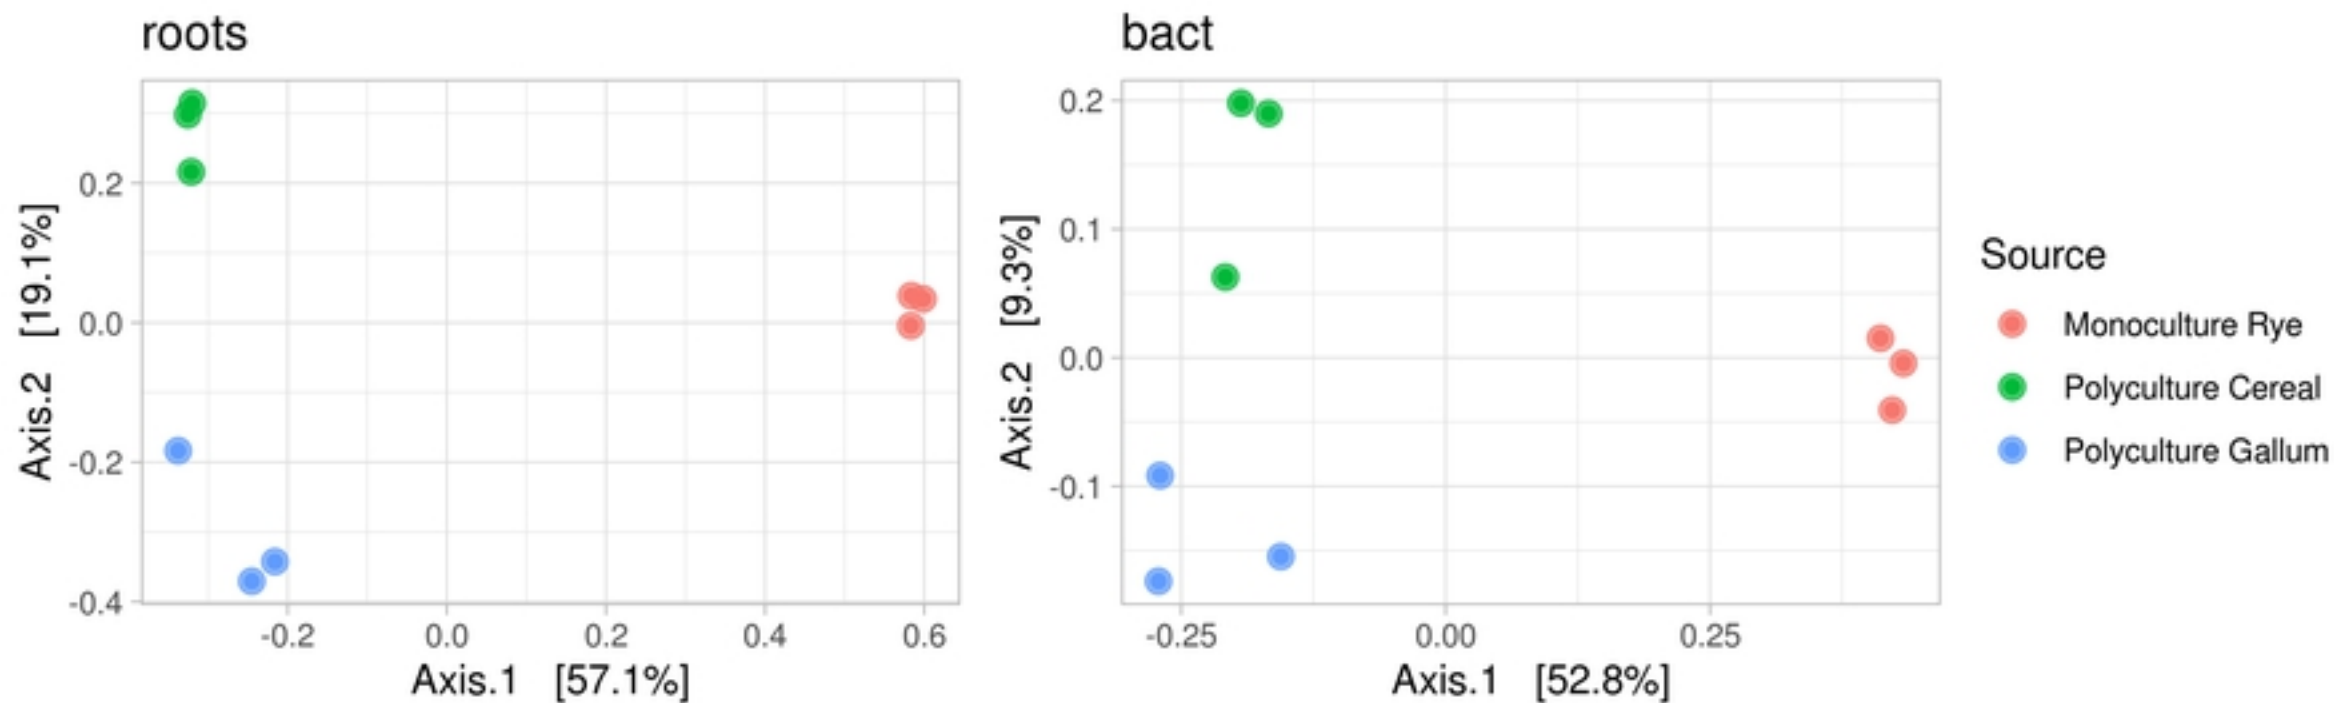

Fig 4

A. Weighted UniFrac

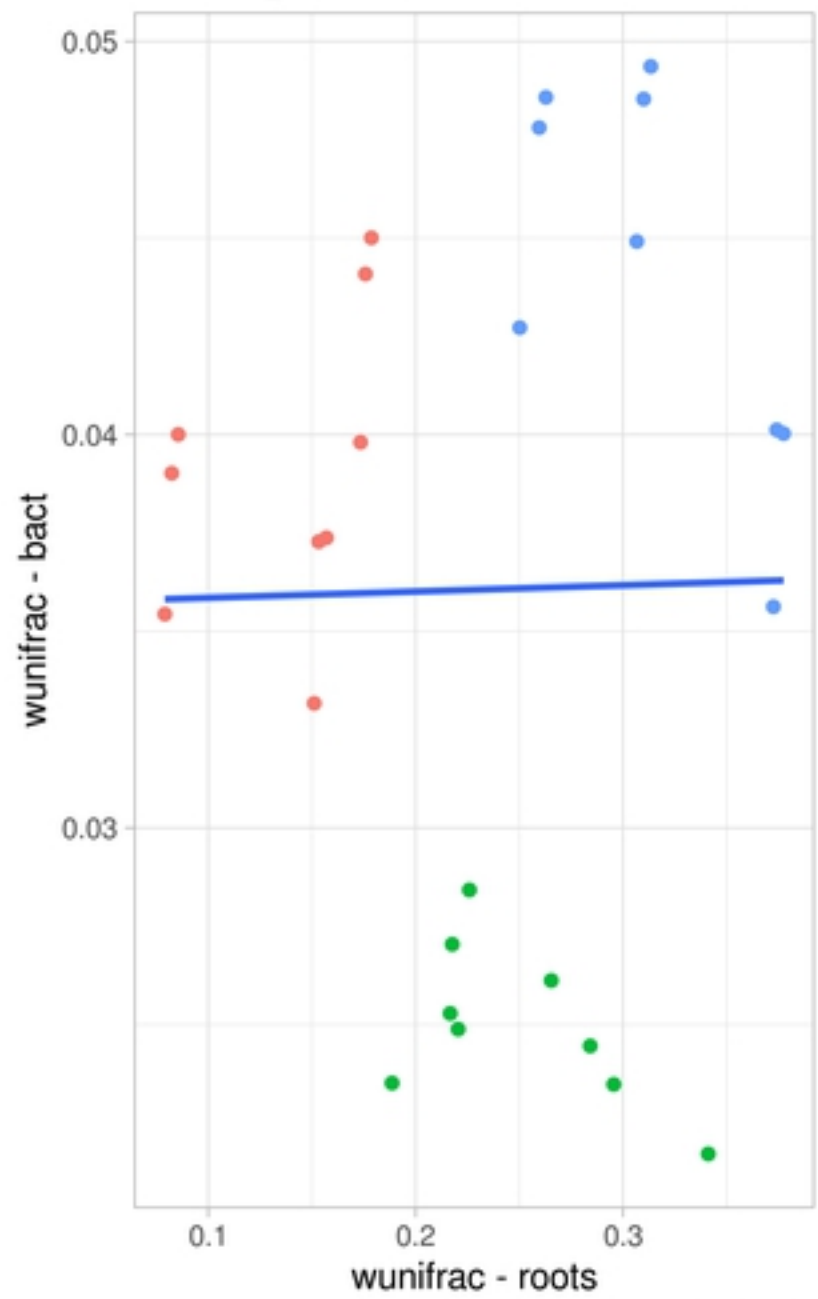

B. Bray distance

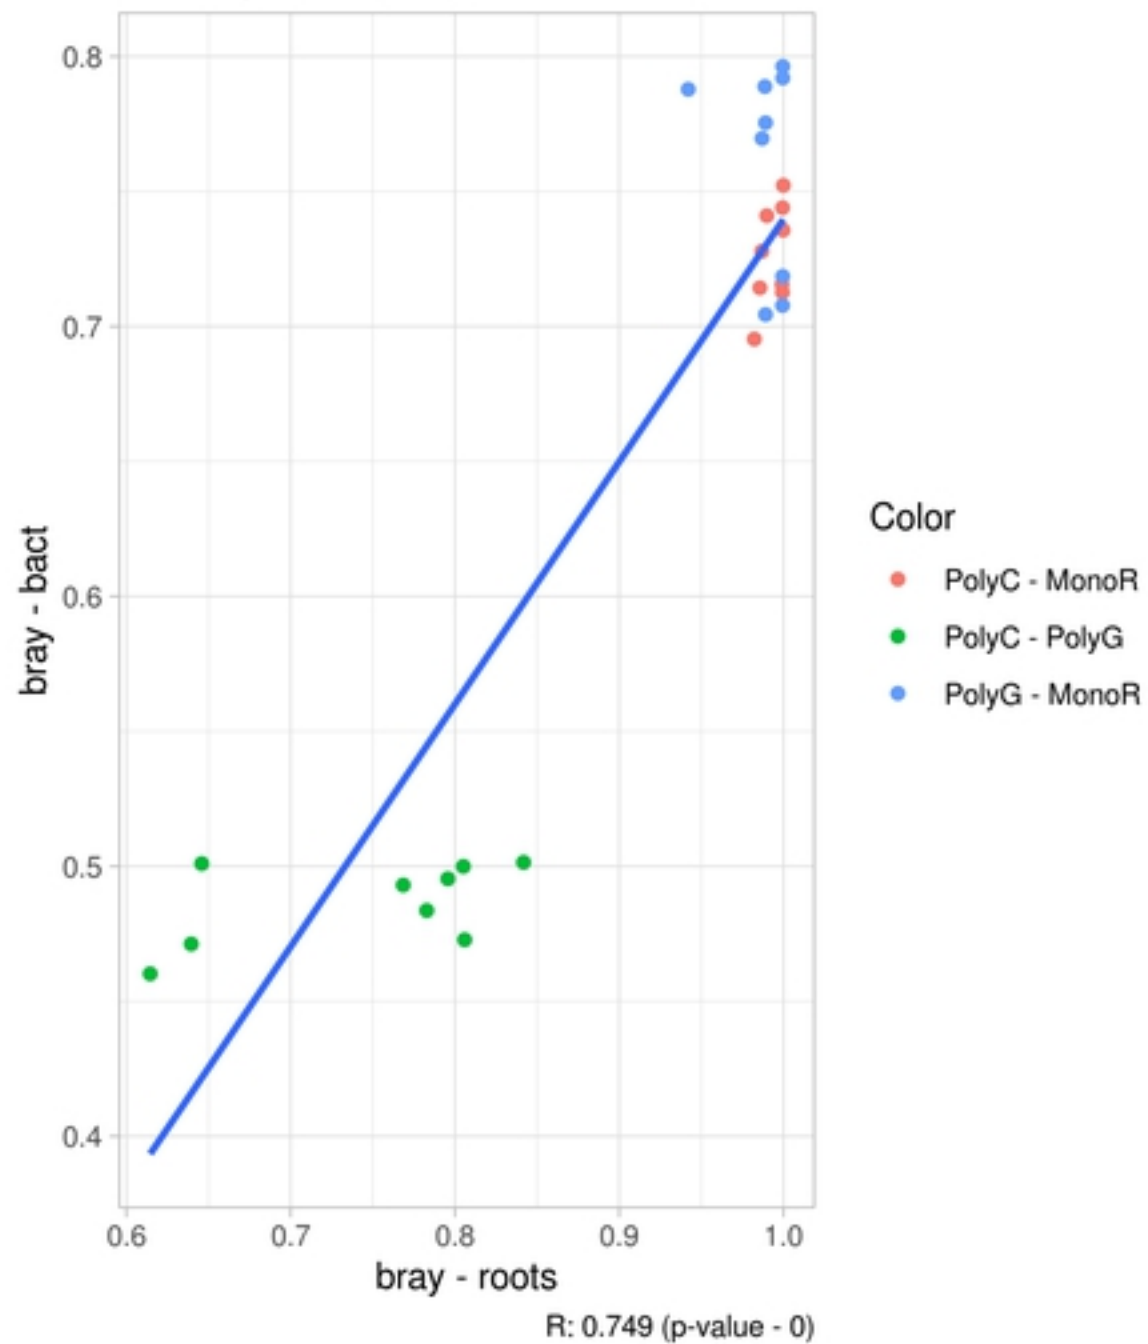

Fig 5

## A. Plant diversity

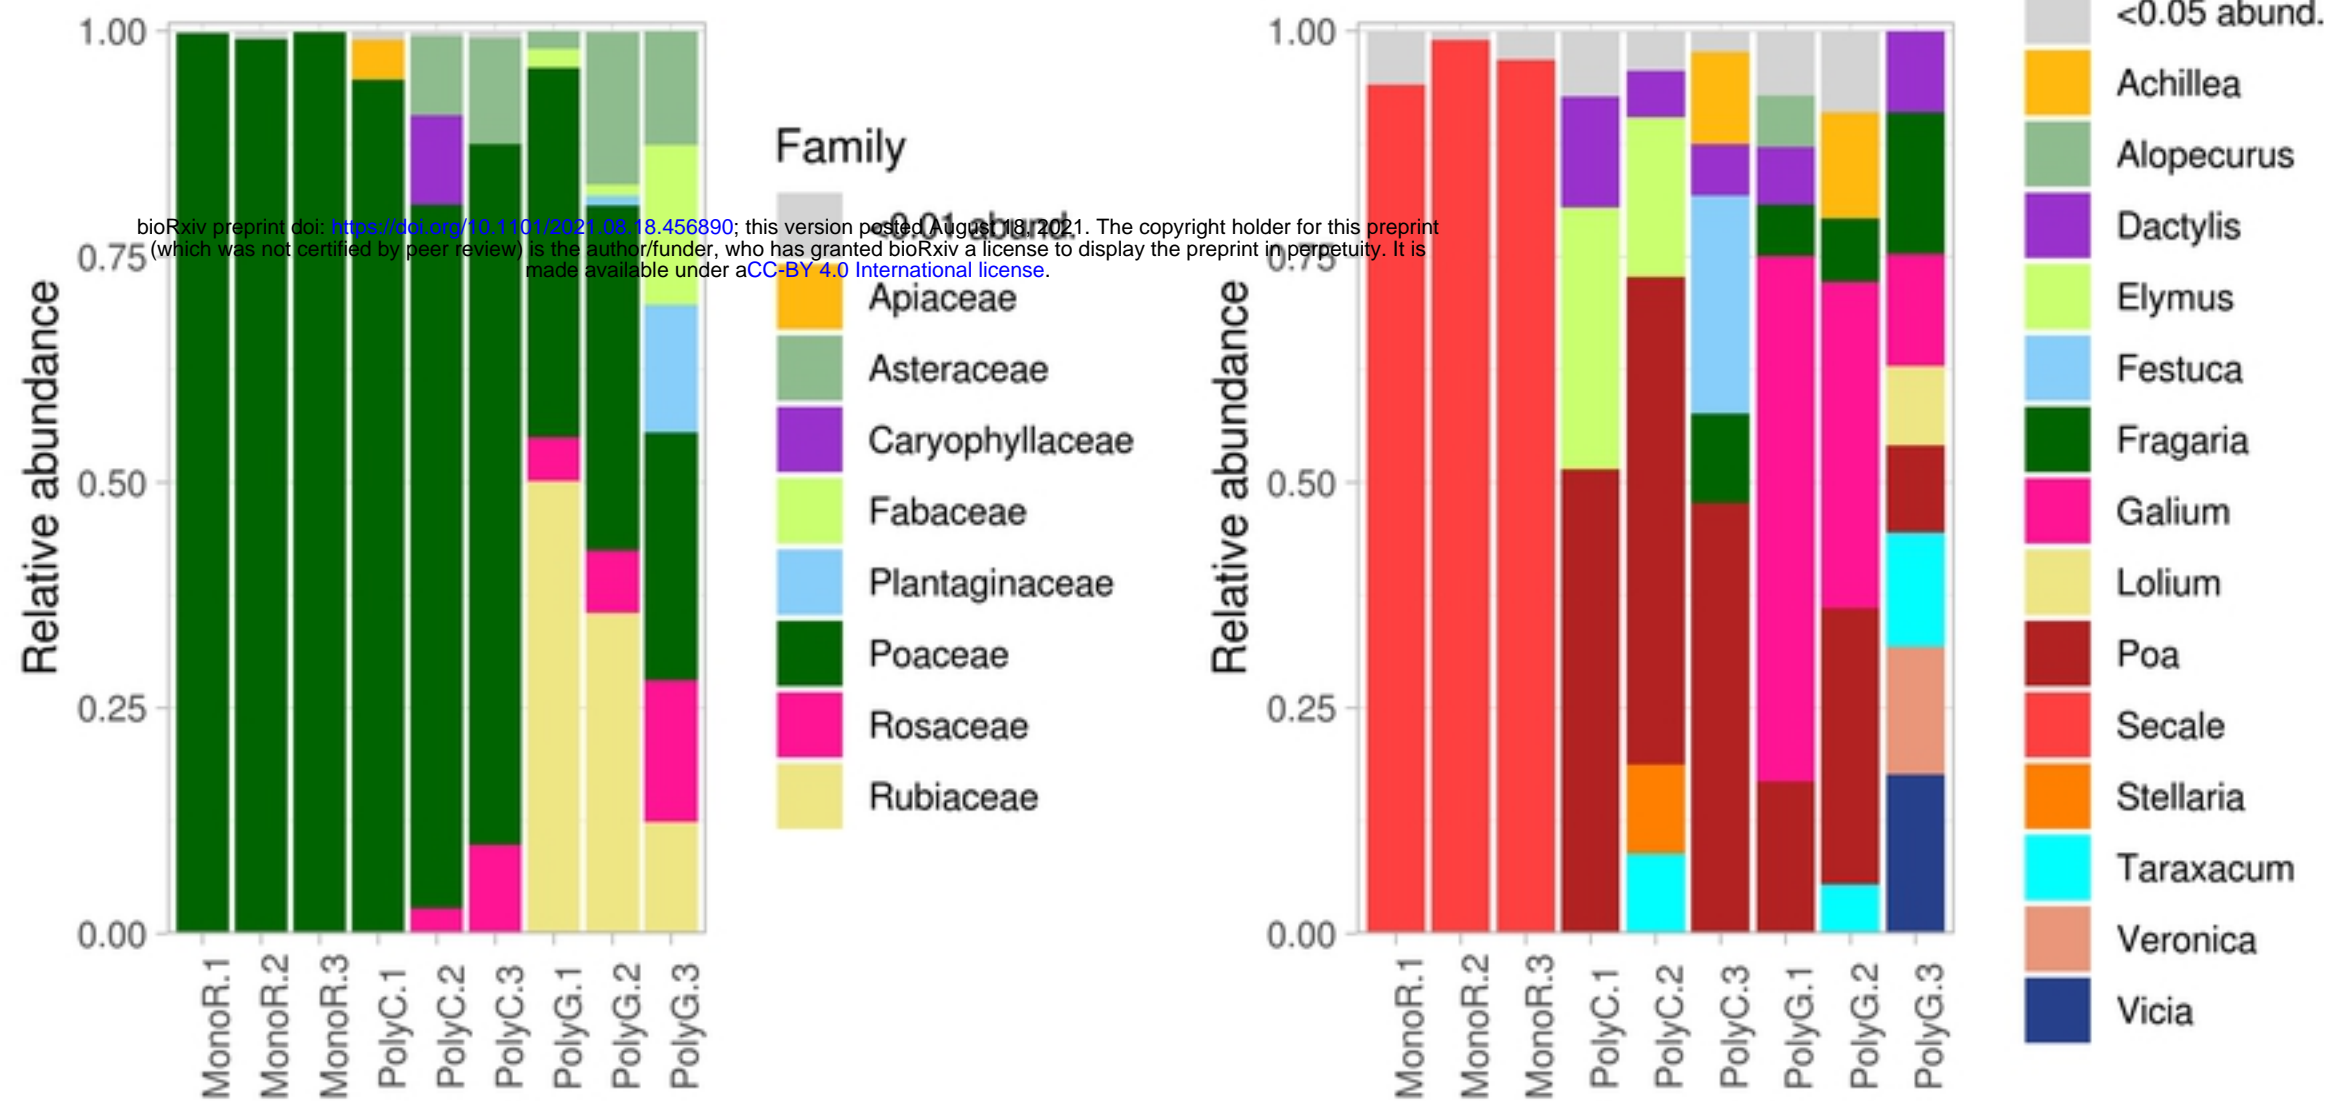

## B. Bacterial diversity

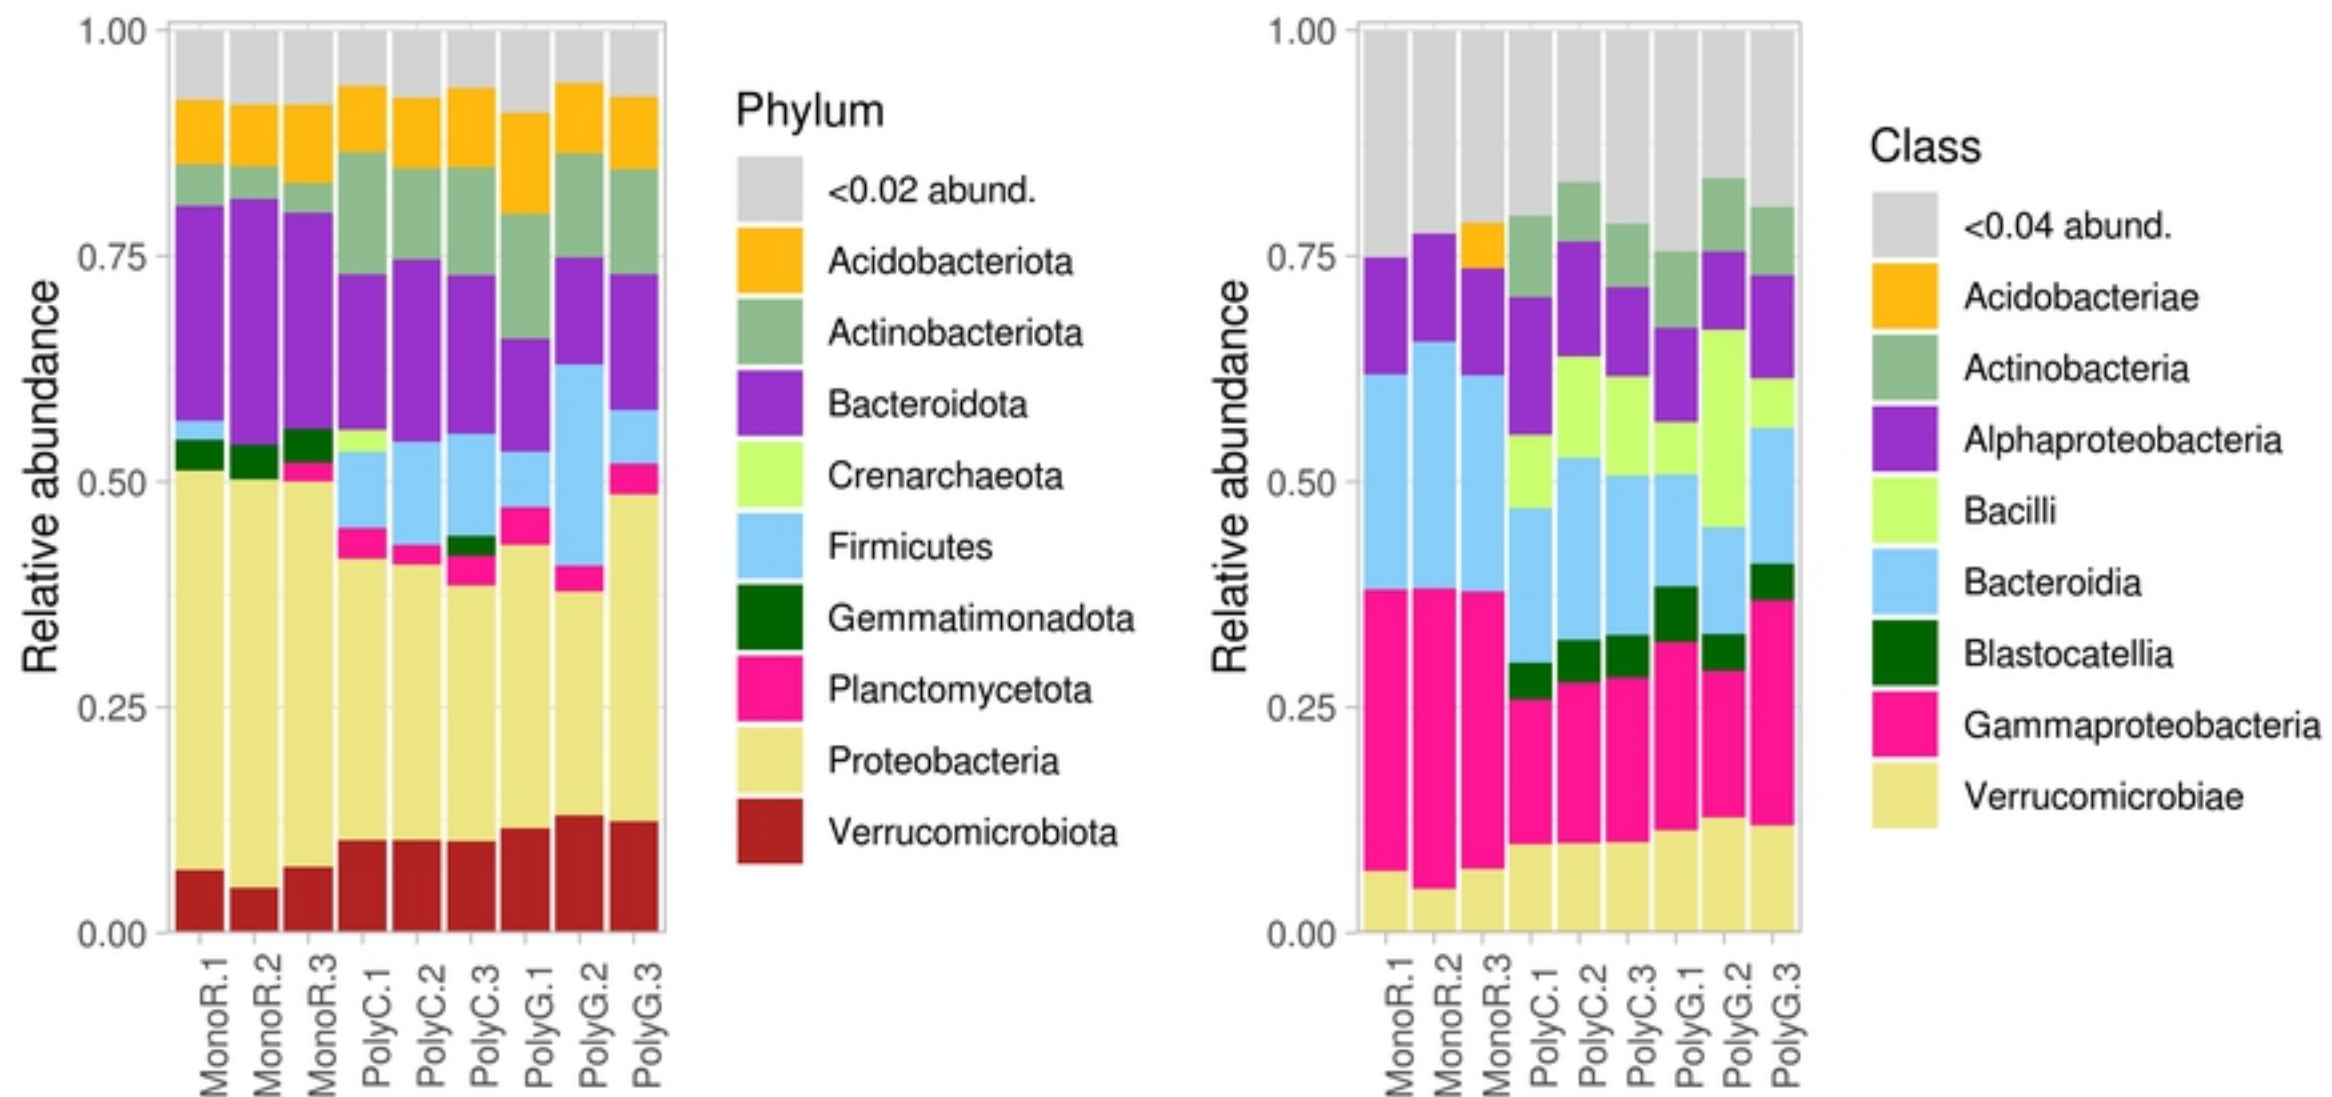

Fig 1
